# Supplementary material for: Cell-penetrating peptide together with PEG-modified mesostructured silica nanoparticles promotes mucous permeation and oral delivery of therapeutic proteins and peptides
Source: Royal Society of Chemistry journal article supplement (doi:10.1039/c9bm00274j), 2019-01-01
Supplement: c9bm00274j1.pdf [file c9bm00274j1.pdf]

## Supporting Information

### **Cell penetrating peptide together with PEG-modified mesostructured silica nanoparticles promotes mucous permeation and oral delivery of therapeutic proteins and peptides**

Xinyi Tan <sup>a</sup>, Yan Zhang <sup>b</sup>, Qian Wang <sup>e, a</sup>, Tianyang Ren <sup>a</sup>, Jingxin Gou <sup>a</sup>, Wei Guo <sup>c</sup>, Tian Yin <sup>d</sup>,  
Haibing He <sup>a, \*</sup>, Yu Zhang <sup>a</sup>, and Xing Tang <sup>a, \*</sup>

<sup>a</sup> Department of Pharmaceutics, Shenyang Pharmaceutical University, Wen Hua Road No. 103, Shenyang, China

<sup>b</sup> Department of Chemistry, Normal College, Shenyang University, Lianhe Road No. 54, Shenyang, China

<sup>c</sup> Department of Pharmacology, Shenyang Pharmaceutical University, Wen Hua Road No. 103, Shenyang, China

<sup>d</sup> School of Traditional Chinese Materia Medica, Shenyang Pharmaceutical University, Wen Hua Road No. 103, Shenyang, China

<sup>e</sup> Tianjin Key Laboratory of Radiation Medicine and Molecular Nuclear Medicine, Institute of Radiation Medicine, Chinese Academy of Medical Sciences & Peking Union Medical College, Tianjin, China

**\*Corresponding author:**

**Professor Xing Tang**

Tel: +86 24 23986343; Fax: +86 24 23911736. E-mail address: tanglab@126.com

**Associate Professor Haibing He**

Tel: +86 24 23986343; Fax: +86 24 23911736. E-mail address: emily\_hehaibing@hotmail.com

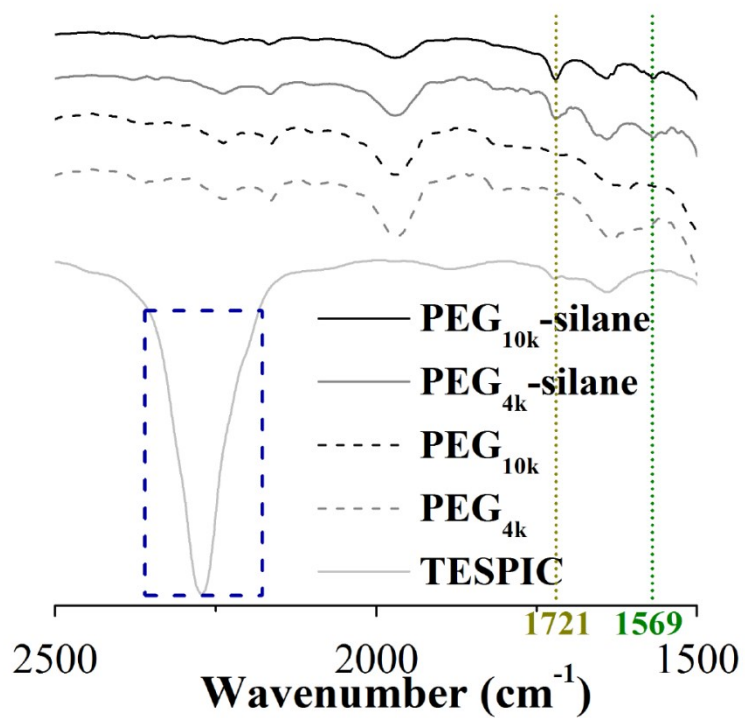

**Figure S1.** FT-IR spectra of intermediates in PEG-modification.

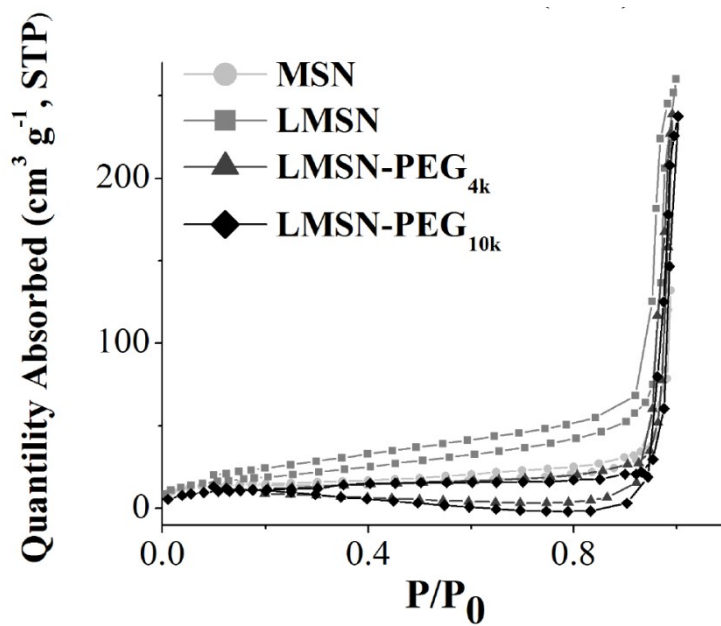

**Figure S2.** N<sub>2</sub> adsorption-desorption isotherms of MSN, LMSN, LMSN-PEG<sub>4k</sub> and LMSN-PEG<sub>10k</sub>.

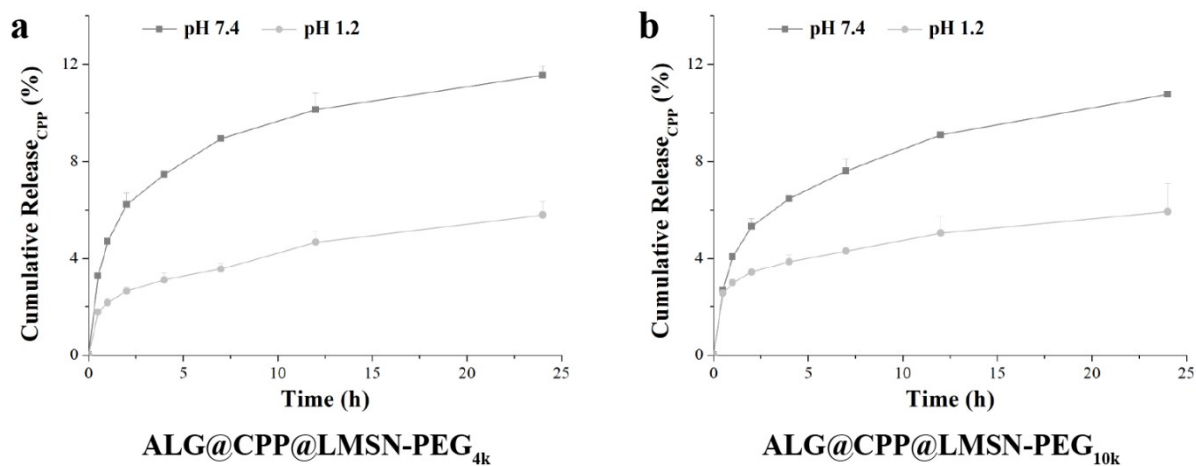

**Figure S3.** *In vitro* CPP release behaviors of ALG-coated (a) CPP@LMSN-PEG<sub>4k</sub> (ALG@CPP@LMSN-PEG<sub>4k</sub>) and (b) CPP@LMSN-PEG<sub>10k</sub> (ALG@CPP@LMSN-PEG<sub>10k</sub>).

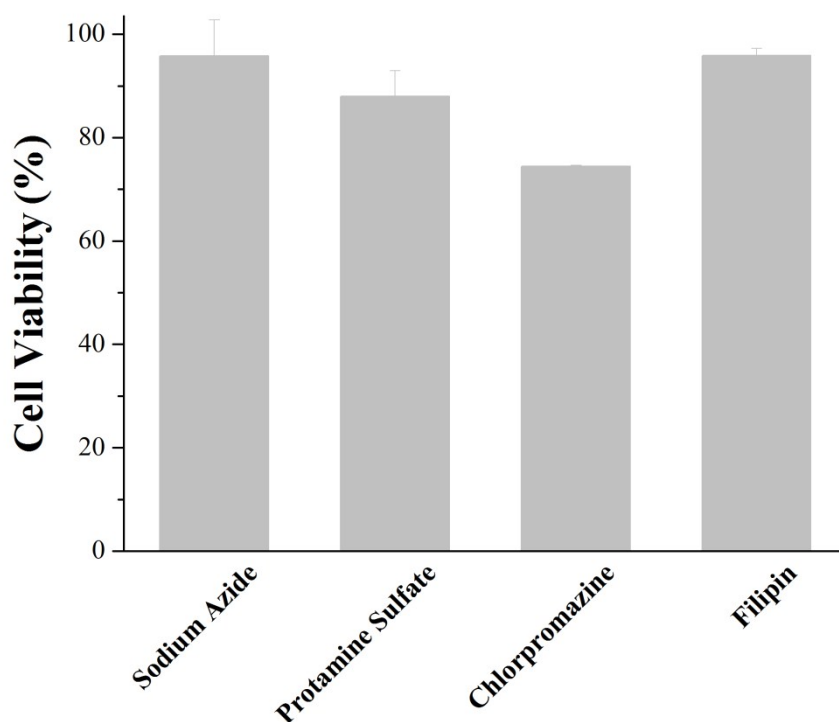

**Figure S4.** Cytotoxicity of specific endocytic inhibitors.

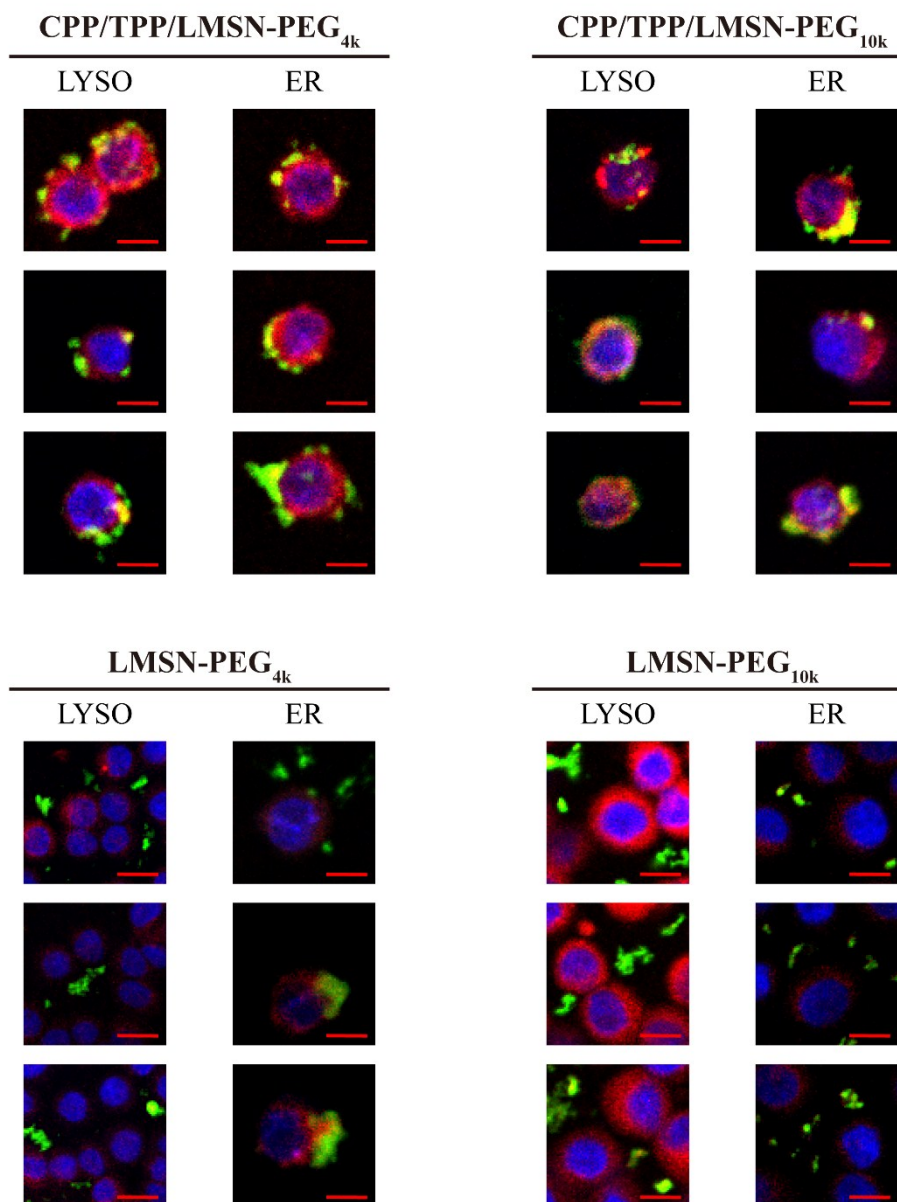

**Figure S5.** LSCM images of HT29 cells incubated with LMSN-PEG<sub>4k</sub> and LMSN-PEG<sub>10k</sub> with or without CPP-involvement under specific lysosome (LYSO) or endoplasmic reticulum (ER) trackers (scale bar: 10 μm).

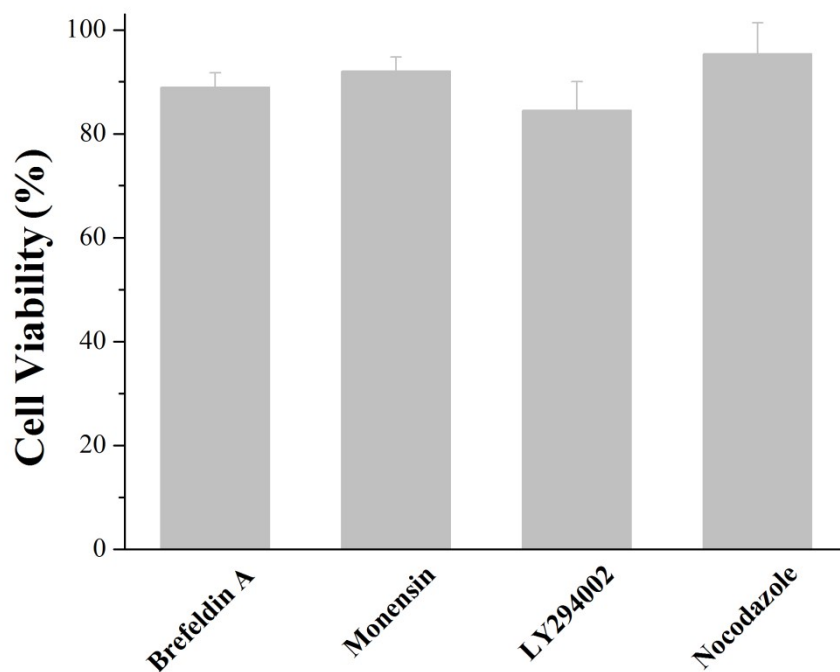

**Figure S6.** Cytotoxicity of specific organelle inhibitors.

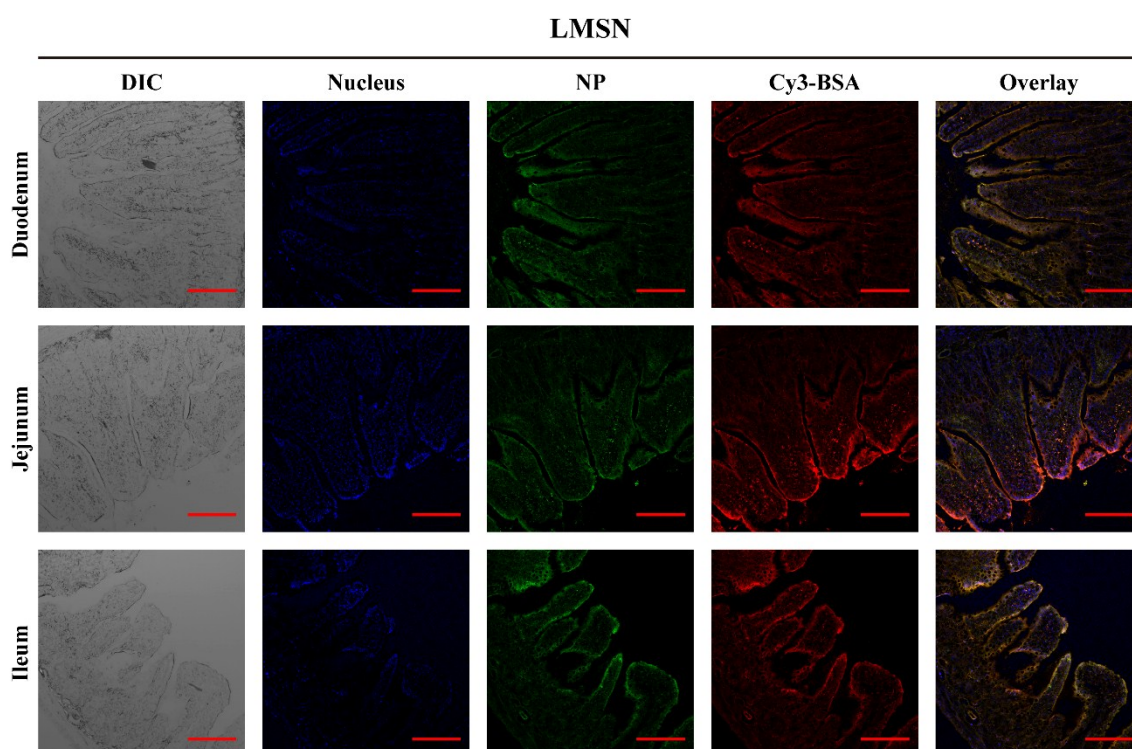

**Figure S7.** LSCM images of duodenum, jejunum and ileum and colon after administration with LMSN system (blue, DAPI-stained nucleus; green, FITC-labeled silica NPs; red, Cy3-labeled cargo; yellow, co-localization of silica NPs and cargos) (scale bar: 200  $\mu$ m).

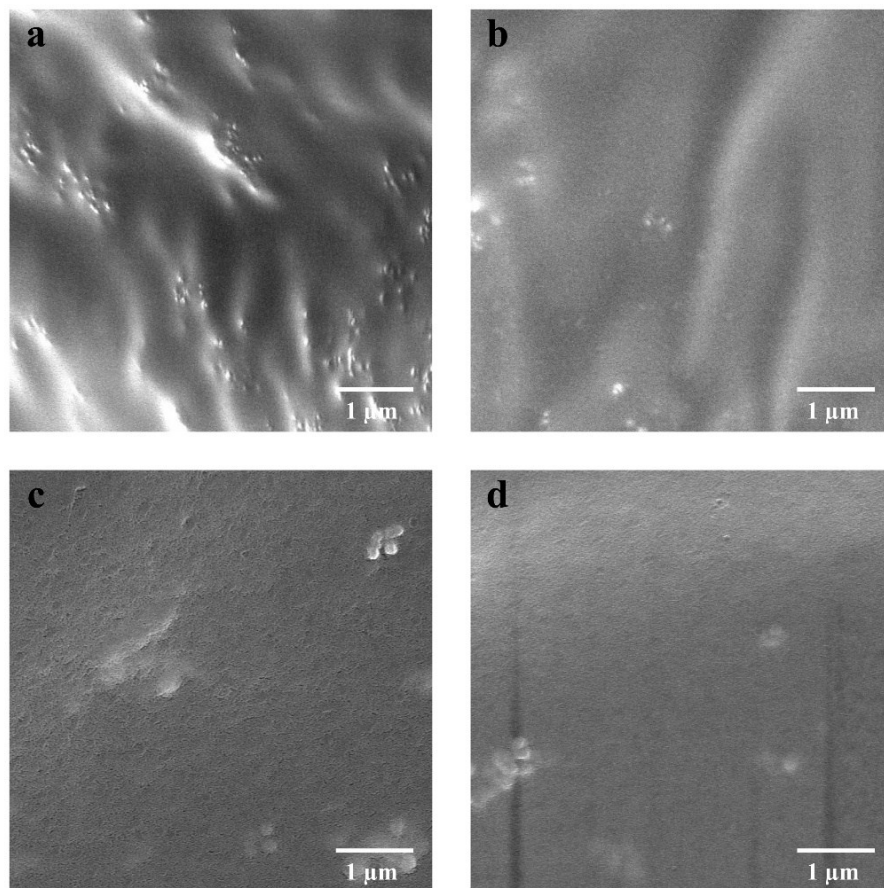

**Figure S8.** SEM images of lyophilized ALG-coated LMSN (a and b), and a small number of silica nanoparticles were hidden behind ALG layers in the shallow depth (c and d).

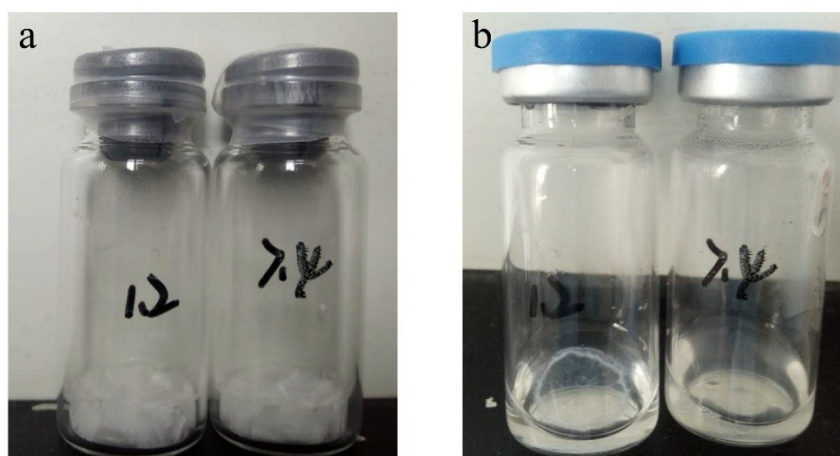

**Figure S9.** Images of lyophilized tablets (a) before and (b) after incubation in medium at pH values of 1.2 (left) and 7.4 (right).



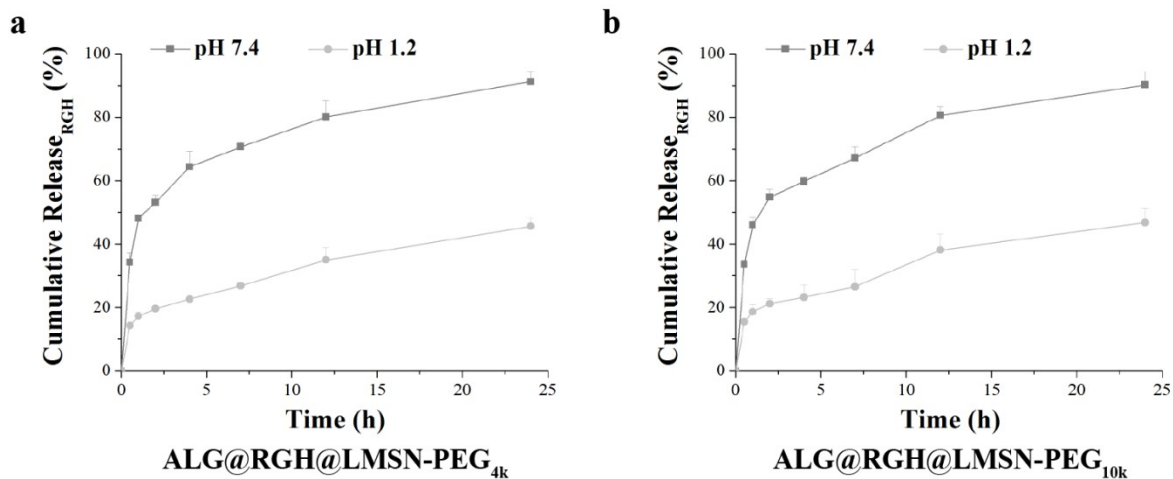

**Figure S10.** *In vitro* RGH release behaviors of (a) ALG-coated RGH@LMSN-PEG<sub>4k</sub> (ALG@RGH@LMSN-PEG<sub>4k</sub>) and (b) RGH@LMSN-PEG<sub>10k</sub> (ALG@RGH@LMSN-PEG<sub>10k</sub>).

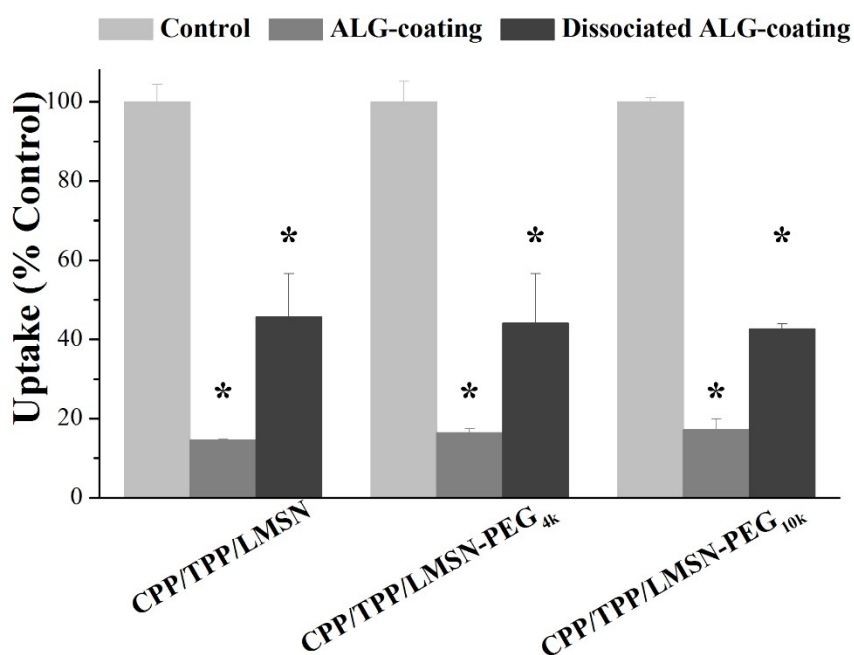

**Figure S11.** Flow cytometry analysis of cellular uptake and mean fluorescent intensity of Caco-2 cells after incubation by CPP/TPP/NP with ALG-coating or dissociated ALG-coating (\* $p < 0.05$ , compared with corresponding control groups).



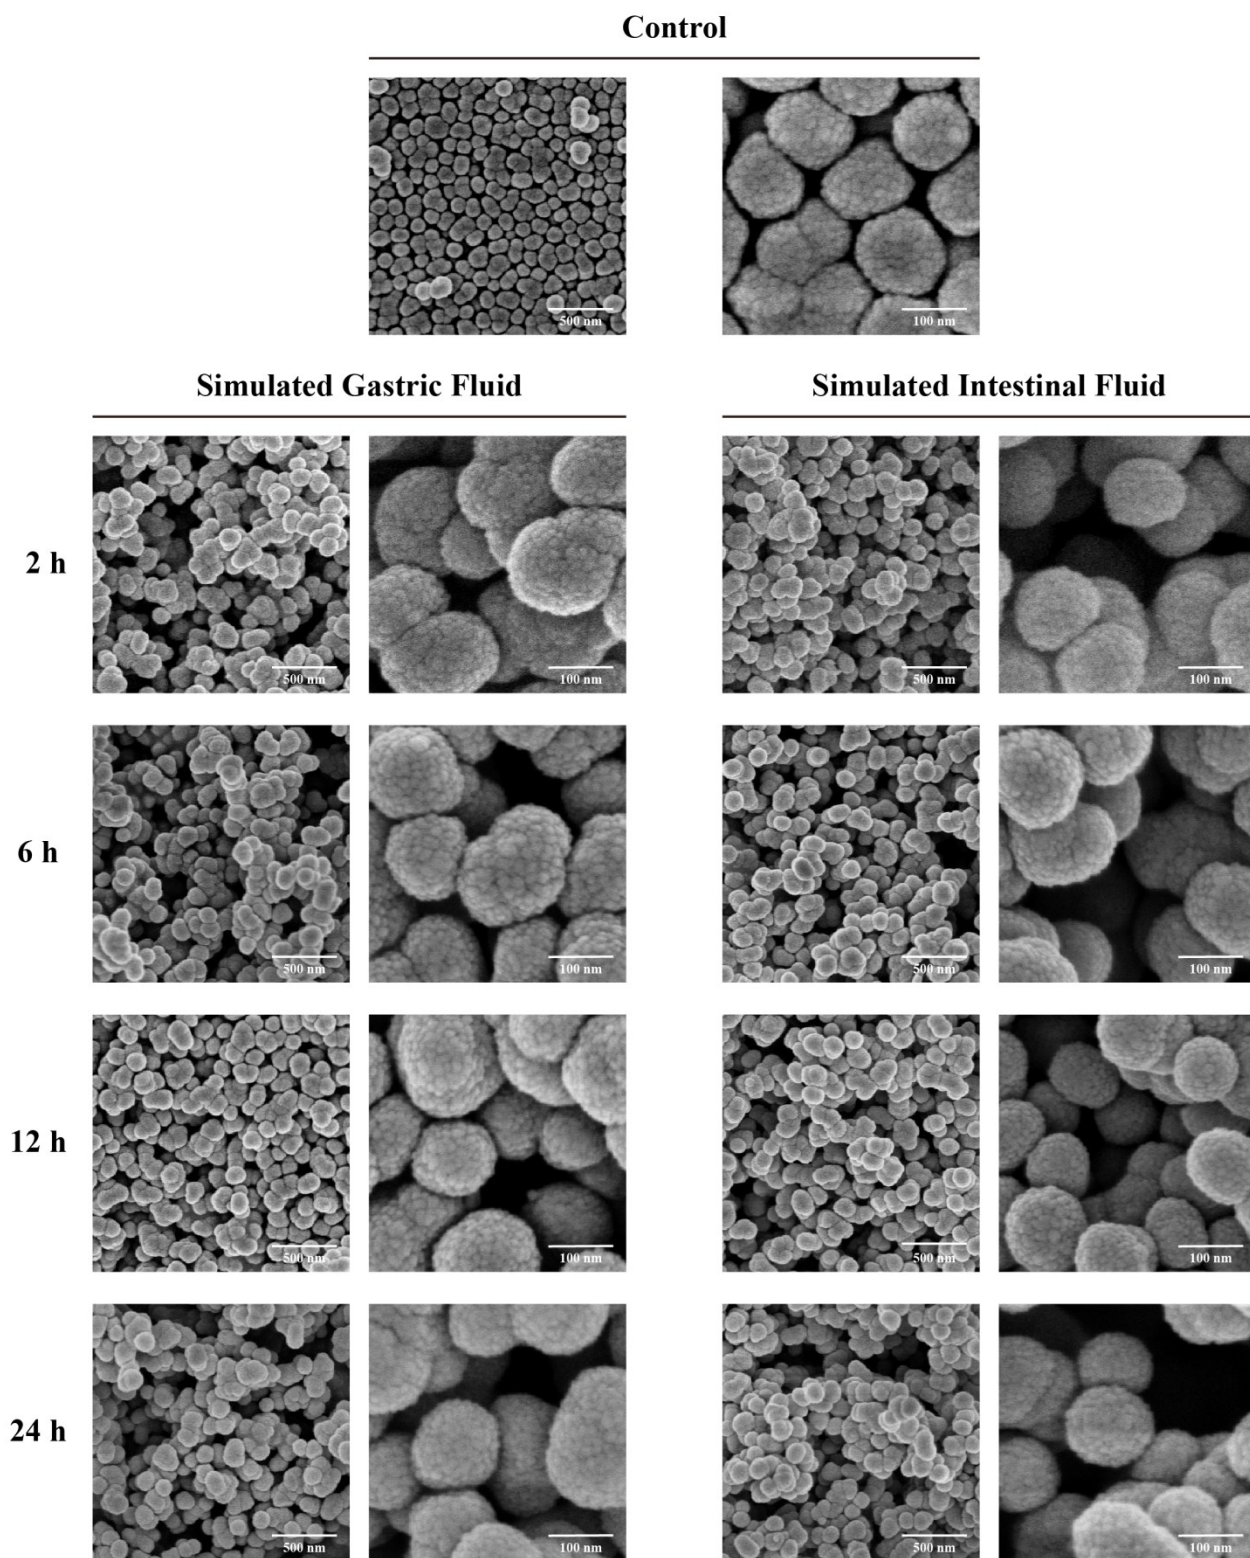

**Figure S12.** SEM images of lyophilized LMSN incubated under simulated gastric fluid and simulated intestinal fluid for 2, 6, 12 and 24 h (scale bar: 500 or 100 nm).

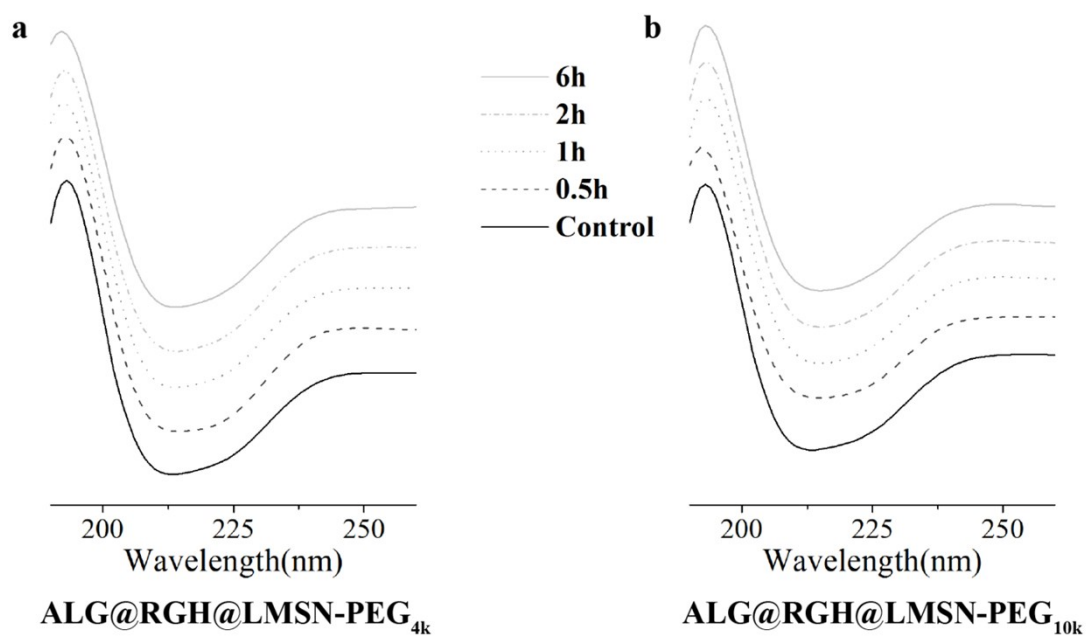

**Figure S13.** Circular dichroism spectra of released RGH samples in (a) RGH@LMSN-PEG<sub>4k</sub> and (b) RGH@LMSN-PEG<sub>10k</sub>.

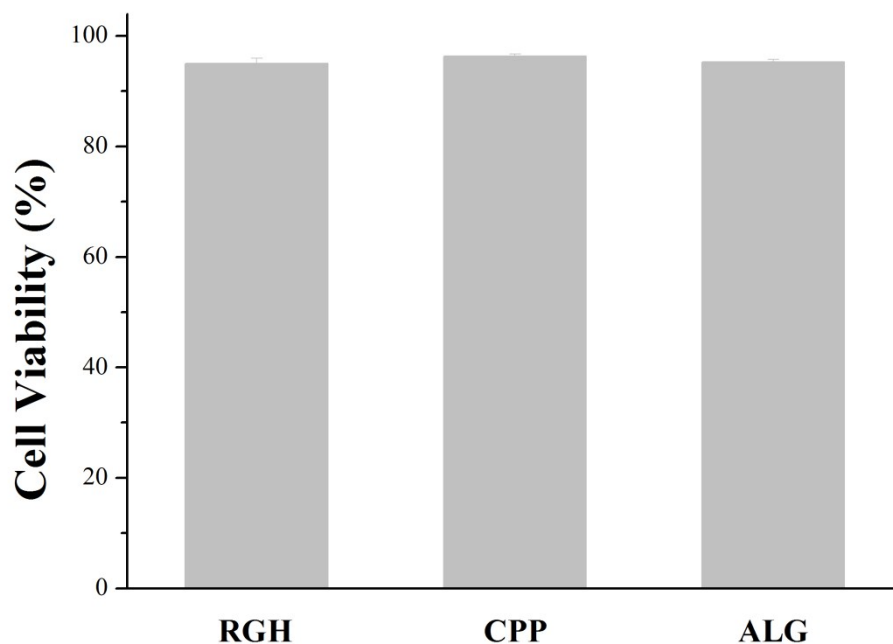

**Figure S14.** Cytotoxicity of RGH, CPP and ALG solutions.

**Table S1.** Zeta potential of silica nanoparticles and their preparations (mV).

|                       | <b>LMSN</b>  | <b>LMSN-PEG<sub>4k</sub></b> | <b>LMSN-PEG<sub>10k</sub></b> |
|-----------------------|--------------|------------------------------|-------------------------------|
| NP                    | -31.8 ± 5.51 | -18.2 ± 6.56                 | -13.6 ± 5.67                  |
| RGH@NP                | -18.6 ± 7.58 | -11.5 ± 4.62                 | -5.91 ± 6.23                  |
| CPP@NP                | 23.9 ± 6.18  | 11.3 ± 4.63                  | 1.59 ± 5.00                   |
| CPP/TPP/NP            | 14.9 ± 3.78  | 10.1 ± 4.77                  | 0.935 ± 4.76                  |
| ALG-coated CPP/TPP/NP | -16.4 ± 4.08 | -18.9 ± 4.52                 | -35.3 ± 8.07                  |

**Table S2.** RGH and CPP loading in ALG-coated CPP/TPP/NP.

|                    | <b>CPP/TPP/LMSN</b> | <b>CPP/TPP/LMSN-PEG<sub>4k</sub></b> | <b>CPP/TPP/LMSN-PEG<sub>10k</sub></b> |
|--------------------|---------------------|--------------------------------------|---------------------------------------|
| RGH loading (DL %) | 1.528               | 1.188                                | 1.108                                 |
| CPP loading (DL %) | 0.754               | 0.739                                | 0.712                                 |
